# Supplementary material for: Fluorescence detection of ligand binding to labeled cytochrome P450BM3
Source: Royal Society of Chemistry journal article supplement (doi:10.1039/c1dt11437a), 2011-12-19
Supplement: c1dt11437a.pdf [file c1dt11437a.pdf]

## SUPPORTING INFORMATION

### Fluorescence detection of ligand binding to labeled cytochrome P450 BM3

Valentina E. V. Ferrero, Giovanna Di Nardo, Gianluca Catucci, Sheila J. Sadeghi  
and Gianfranco Gilardi\*

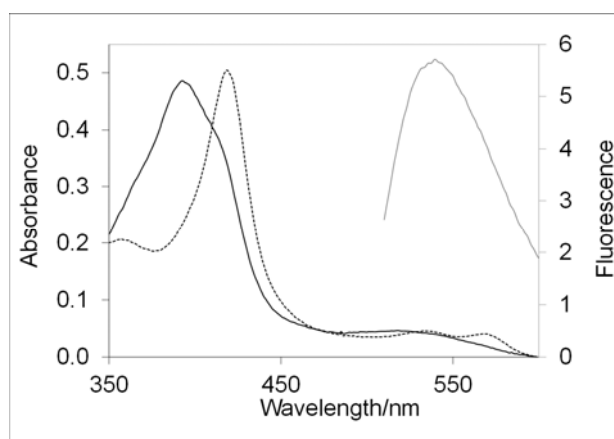

Figure S1. Spectra overlap between the absorption spectra of propranolol- (solid line) and arachidonate-bound BMP (dashed line) and the fluorescence emission spectra of IANBD (grey line)
